# Supplementary material for: Reversible sensing of aqueous mercury using a rhodamine-appended polyterthiophene network on indium tin oxide substrates
Source: Royal Society of Chemistry journal article supplement (doi:10.1039/c4ra11353e), 2014-10-08
Supplement: c4ra11353e1.pdf [file c4ra11353e1.pdf]

**Reversible sensing of aqueous mercury using a rhodamine-appended  
polyterthiophene network on indium tin oxide substrates**

**Chatthai Kaewtong,<sup>\*a</sup> Noi Niamsa,<sup>a</sup> Buncha Pulpoka<sup>b</sup> and Thawatchai Tuntulani<sup>b</sup>**

*<sup>a</sup>Nanotechnology Research Unit and Supramolecular Chemistry Research Unit, Department of Chemistry and Center of Excellence for Innovation in Chemistry, Faculty of Science, Mahasarakham University, Mahasarakham, 44150, Thailand. Fax: 66 0437 54246; Tel: 66 0437 54246; E-mail: [kchatthai@gmail.com](mailto:kchatthai@gmail.com)*

*<sup>b</sup>Supramolecular Chemistry Research Unit, Department of Chemistry, Faculty of Science, Chulalongkorn University, Bangkok 10330, Thailand. Fax: 66 0221 87598; Tel: 66 0221 87643.*

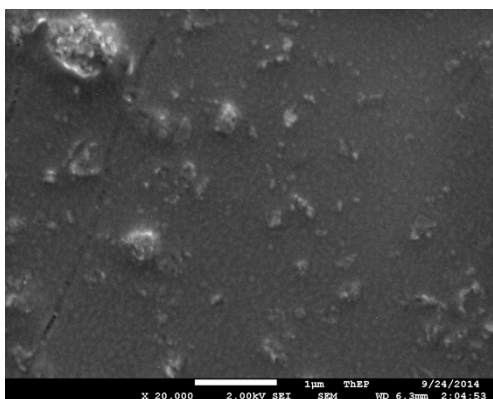

a)

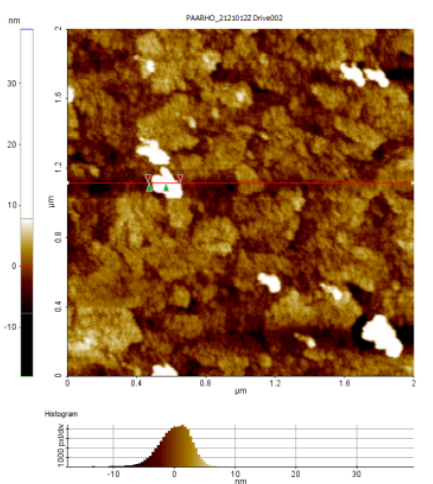

b)

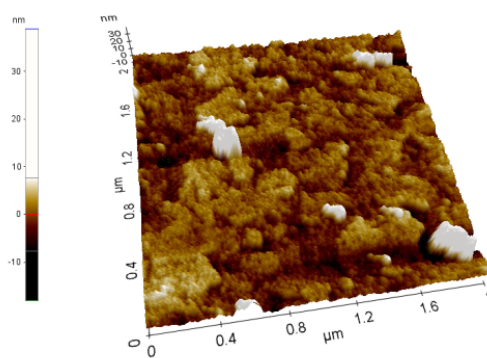

c)

**Figure S1.** FESEM image (a) and 2D, 3D (b,c) AFM images of PRhoT electropolymerized at 50 mV/s in TBAPF<sub>6</sub>/CH<sub>2</sub>Cl<sub>2</sub> electrolyte (WE, ITO; CE, Pt wire; RE, Ag/AgCl wire) on the ITO substrate at the range of 0.0 - 1.0 V.
